# Supplementary material for: The past, present, and future in the nomenclature and structure representation of inorganic compounds
Source: Royal Society of Chemistry journal article supplement (doi:10.1039/c9dt00352e), 2019-01-01
Supplement: c9dt00352e4.pdf [file c9dt00352e4.pdf]

**INTERNATIONAL UNION  
OF PURE AND APPLIED CHEMISTRY**  
**DIVISION OF CHEMICAL NOMENCLATURE  
AND STRUCTURE REPRESENTATION**

RED BOOK ESSENTIALS 2015

**Kort vejledning i uorganisk-kemisk  
nomenklatur**

R. M. Hartshorn (New Zealand), K.-H. Hellwich (Tyskland), A. Yerin (Rusland), T. Damhus (Danmark), A. T. Hutton (Sydafrika).

Dansk oversættelse og tilpasning ved  
A. Senning og T. Damhus, Kemisk Forenings Nomenklaturudvalg (2016).  
Kontakt til udvalget: [editor@kemisknomenklatur.dk](mailto:editor@kemisknomenklatur.dk).

**FORORD**

Den verdensomspændende vedtagelse af en anerkendt kemisk nomenklatur er et uundværligt værktøj til kommunikation inden for de kemiske videnskaber, til computerbaseret søgning i databaser og til myndighedsbrug som fx ved regelhåndhævelse inden for sundhedsområdet, arbejds- og miljø sikkerhed samt handelsforhold. [International Union of Pure and Applied Chemistry \(IUPAC\)](#) stiller anbefalinger til rådighed, som dækker karakteren og anvendelsen af kemisk nomenklatur.<sup>1</sup> De grundlæggende træk af denne nomenklatur vises her samt i søsterdokumenter vedrørende nomenklaturssystemer for [organisk kemi](#)<sup>2</sup> og [polymerer](#),<sup>3</sup> med hyperlinks til originaldokumenterne. Et generelt overblik over kemisk nomenklatur findes i [Principles of Chemical Nomenclature](#).<sup>4</sup> En mere detaljeret fremstilling kan man finde i [Nomenclature of Inorganic Chemistry](#), mere uhøjtideligt kendt som den Røde Bog,<sup>5</sup> og i søsterpublikationerne for [organiske forbindelser](#) (den Blå Bog)<sup>6</sup> og for [polymerer](#) (den Lilla Bog).<sup>7</sup> Det skal bemærkes, at mange forbindelser kan have ikke-systematiske eller halvsystematiske navne (af hvilke nogle ikke accepteres af IUPAC af en række grunde, fx fordi de er flertydige), og at IUPAC-reglerne i mange tilfælde tillader mere end ét systematisk navn. IUPAC bestræber sig på at udpege foretrukne navne til brug ved formulering af love og regler (Preferred IUPAC Names eller PIN).

Grænserne mellem 'organiske' og 'uorganiske' forbindelser er uskarpe. De nomenklaturtyper, som beskrives i dette dokument, egner sig til forbindelser, molekyler og ioner, som ikke indeholder carbon (Afsnit 2), fremfor alt dem, der dannes af grundstoffer fra grupperne 1-12. De fleste borforbindelser behandles ved hjælp af en særlig nomenklatur.<sup>8</sup>

NB: I dette dokument benyttes tegnet '=' ved deling af kemiske navne, som er for lange til tabelspalterne eller som undertekster til figurer, med mindre navnet allerede indeholder en passende placeret bindestreg.

**1 STØKIOMETRISKE NAVNE ELLER SAMMENSÆTNINGSNAVNE**

Et **støkiometrisk navn** eller **sammensætningsnavn** gør kun rede for sammensætningen af en ion, et molekyle eller en forbindelse og kan enten bygge på den empiriske formel eller molekylformlen for den pågældende species. Navnet giver ingen information om strukturen.

For **homoatomige species**, som altså kun indeholder ét grundstof, dannes navnet (Tabel 1) ved kombination af grundstofnavnet med det relevante **multiplikative præfiks** (Tabel 2). Ioner benævnes ved tilføjelse af ladningstal i parentes, fx. (1+), (3+), (2-), og i homoatomige anioners navne tilføjes 'id', enten umiddelbart til grundstofnavnet (fx for nikkell og zink samt ædelgasserne, hvis navne ender på 'on') eller i stedet for endelserne 'ogen', 'ium', 'or', 'um', 'ur' eller 'ygen' (jf. Afsnit 2.3).<sup>9</sup> I nogle tilfælde konstrueres anionnavnet på denne måde ud fra et latinsk navn for grundstoffet (gælder for Ag, Au, Cu, Fe, Hg, Pb, Sn og S). For nogle homoatomige ioner findes der acceptable traditionelle navne (som bruges uden ladningstal).

**Tabel 1: Eksempler på homoatomige species**

| Formel           | Navn        | Formel                       | Navn                      |
|------------------|-------------|------------------------------|---------------------------|
| O <sub>2</sub>   | dioxygen    | Cl <sup>-</sup>              | chlorid(1-) eller chlorid |
| S <sub>8</sub>   | octasovl    | I <sub>3</sub> <sup>-</sup>  | triiodid(1-)              |
| Na <sup>+</sup>  | natrium(1+) | O <sub>2</sub> <sup>2-</sup> | dioxid(2-) eller peroxid  |
| Fe <sup>3+</sup> | jern(3+)    | N <sub>3</sub> <sup>-</sup>  | trinitrid(1-) eller azid  |

**Tabel 2: Multiplikative præfikser for enkle og komplicerede species**

| Antal | Enkle | Komplicerede | Antal | Enkle  | Komplicerede |
|-------|-------|--------------|-------|--------|--------------|
| 2     | di    | bis          | 8     | octa   | octakis      |
| 3     | tri   | tris         | 9     | nona   | nonakis      |
| 4     | tetra | tetrakis     | 10    | deca   | decakis      |
| 5     | penta | pentakis     | 11    | undeca | undecakis    |
| 6     | hexa  | hexakis      | 12    | dodeca | dodecakis    |
| 7     | hepta | heptakis     | 20    | icosa  | icosakis     |

**Binære forbindelser** (indeholdende atomer af to grundstoffer) får deres støkiometriske navn ved, at man kombinerer grundstofnavnene og overholder den konvention, at det grundstof, som nås først, når man følger pilen i grundstofsekvensen (Figur 1), betragtes som værende en anion. Således forsynes navnet af dette formelt 'elektronegative' grundstof med endelsen 'id' og står efter navnet af det formelt 'elektropositive' grundstof (Tabel 3).

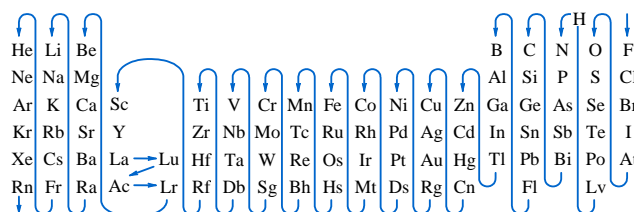

**Figur 1: Grundstofsekvens**

**Tabel 3: Eksempler på binære forbindelser**

| Formel           | Navn                                  | Formel                        | Navn                                   |
|------------------|---------------------------------------|-------------------------------|----------------------------------------|
| GaAs             | galliumarsenid                        | FeCl <sub>2</sub>             | jernchlorid eller jern(II)chlorid      |
| CO <sub>2</sub>  | carbondioxid                          | FeCl <sub>3</sub>             | jerntrichlorid eller jern(III)chlorid  |
| CaF <sub>2</sub> | calciumdifluorid eller calciumfluorid | H <sub>2</sub> O <sub>2</sub> | dihydrogendioxid eller hydrogenperoxid |

Også her benyttes multiplikative præfikser (Tabel 2) efter behov, mens visse acceptable alternative navne<sup>10</sup> også må bruges. I nogle tilfælde kan støkiometrien defineres ved hjælp af oxidationstal, men den underforstås ofte bare i velkendte forbindelsers navne, fx calciumfluorid.

**Heteroatomige species** kan i almindelighed benævnes på lignende måde, men tit benyttes enten substitutiv<sup>11</sup> eller additiv nomenklatur (Afsnit 2). I det sidste tilfælde gives der også information om den måde, atomerne er bundet til hinanden. For eksempel gives POCl<sub>3</sub> (eller PCl<sub>3</sub>O, sammensætningsnavn phosphortrichloridoxid) i Tabel 10 et additivt navn.

Visse ioner har traditionelle korte navne, som bruges for det meste og stadigvæk er accepterede (fx ammonium, NH<sub>4</sub><sup>+</sup>; hydroxid, OH<sup>-</sup>; nitrit, NO<sub>2</sub><sup>-</sup>; fosfat, PO<sub>4</sub><sup>3-</sup>; diphosphat, P<sub>2</sub>O<sub>7</sub><sup>4-</sup>).

Generelt kan uorganiske forbindelser være sammensat af kationer, anioner og neutrale species. Man benævner dem konventionsmæssigt ved at opskrive komponenterne: kationer før anioner og til sidst neutrale komponenter (se eksemplerne i Tabel 4).

**Tabel 4: Brug af multiplikative præfikser i støkiometriske navne**

| Formel                                                                                              | Navn                                                                                 |
|-----------------------------------------------------------------------------------------------------|--------------------------------------------------------------------------------------|
| Ca <sub>3</sub> (PO <sub>4</sub> ) <sub>2</sub>                                                     | tricalciumbis(phosphat)                                                              |
| Ca <sub>2</sub> P <sub>2</sub> O <sub>7</sub>                                                       | dicalciumdiphosphat                                                                  |
| BaO <sub>2</sub>                                                                                    | barium(2+)dioxid(2-) eller bariumperoxid                                             |
| MgSO <sub>4</sub> ·7H <sub>2</sub> O                                                                | magnesiumsulfat-heptahydrat                                                          |
| CdSO <sub>4</sub> ·6NH <sub>3</sub>                                                                 | cadmiumsulfat—ammoniak (1/6)                                                         |
| AlK(SO <sub>4</sub> ) <sub>2</sub> ·12H <sub>2</sub> O                                              | aluminiumkaliumbis(sulfat)—vand (1/12) eller aluminiumkaliumbis(sulfat)-dodecahydrat |
| Al <sub>2</sub> (SO <sub>4</sub> ) <sub>3</sub> ·K <sub>2</sub> SO <sub>4</sub> ·24H <sub>2</sub> O | dialuminiumtris(sulfat)—dikaliumsulfat—vand (1/1/24)                                 |

Antallet af hver tilstedeværende species skal angives for at repræsentere forbindelsens sammensætning. Det gøres ved at hvert speciesnavn forsynes med det relevante multiplikative præfiks (Tabel 2). Præfikserne er 'di', 'tri', 'tetra' osv., når det drejer sig om simple species, ellers 'bis()', 'tris()', 'tetrakis()' osv. foran navnene på de fleste species, som i forvejen indeholder multiplikative præfikser eller lokanter. Særligt varsel må man være i situationer, hvor et simpelt multiplikativt præfiks kunne blive misforstået, fx tris(iodid) skal bruges for 3I<sup>-</sup> og ikke triiodid (som benyttes for I<sub>3</sub><sup>-</sup>) og bis(phosphat) i stedet for diphosphat (som bruges for P<sub>2</sub>O<sub>7</sub><sup>4-</sup>). Eksempler kan ses i Tabel 4. Vokaler udelades ikke (fx tetraaqua, pentaoxid), undtagen i det specielle tilfælde monoxid. Neutrale komponenters navne adskilles ved lange tankestreger uden mellemrum. Uorganiske forbindelser kan indgå som komponenter i

(formelle) **additionsforbindelser** (de sidste fire eksempler i Tabel 4). I det specielle tilfælde af hydrater kan de multiplikative præfikser benyttes foran betegnelsen 'hydrat'.

## 2 KOMPLEKSER OG ADDITIV NOMENKLATUR

### 2.1 Generel fremgangsmåde

Den additive nomenklatur blev udviklet til beskrivelse af koordinationsforbindelsers dvs. kompleksers struktur, men metoden kan også nemt bruges for andre molekyler. Énkernede komplekser betragtes som bestående af et centralatom, tit en metalion, bundet til et sæt af små molekyler eller ioner, som betegnes som ligander. Komplekser navne konstrueres på den måde (Tabel 5), at ligandernes navne anføres *før* centralatomernes, og forsynes med de relevante multiplikative præfikser. Formler sammensættes ved at man tilføjer ligandernes symboler eller forkortelser *efter* symbolerne for centralatomerne (Afsnit 2.7).

**Tabel 5: Dannelse af kompleksnavne: simple ligander**

|                                 |                                                                                   |                                                                                   |
|---------------------------------|-----------------------------------------------------------------------------------|-----------------------------------------------------------------------------------|
| Struktur, der skal navngives    | 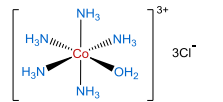 |  |
| Centralatom(er)                 | <b>cobalt(III)</b>                                                                | <b>2 × rhenium</b>                                                                |
| Identificér og navngiv ligander | ammoniak → <b>ammin</b><br>vand → <b>aqua</b>                                     | chlorid → <b>chlorido</b>                                                         |
| Samlet navn                     | <b>pentaammin</b> aqua=<br><b>cobalt(III)chlorid</b>                              | caesiumbis( <b>tetrachlorido</b> =<br><b>rhenat</b> )( <b>Re—Re</b> )(2-)         |

### 2.2 Centralatom(er) og ligander

Som første trin gælder det at udpege centralatomet (-atomer) og dermed også liganderne. Ifølge konventionen betragtes de elektroner, som binder centralatomet og en ligand, normalt som tilhørende liganden (og dette bestemmer navngivningen af liganden).

Hver enkelt ligand benævnes som selvstændig species, ved hjælp af den relevante nomenklatur<sup>4</sup> – normalt substitutiv nomenklatur for organiske ligander<sup>2,4,6</sup> og additiv nomenklatur for uorganiske ligander. Et lille antal almindelige molekyler og ioner tildeles **specielle navne**, når de optræder i komplekser. For eksempel betegnes et vandmolekyle som ligand i kompleksets fuldstændige navn med 'aqua'. Et ammoniakmolekyle som ligand kaldes 'ammin'. Når carbonmonoxid er bundet til centralatomet gennem carbonatomet, får det betegnelsen 'carbonyl'. For nitrogenmonoxid, bundet gennem nitrogenatomet, bruges ligandnavnet 'nitrosyl'. Anioniske liganders navne, som ender på 'id', 'at' eller 'it', ændres i det fuldstændige additive kompleksnavn til henholdsvis 'ido', 'ato' og 'ito'. Bemærk at endelsen 'ido' nu også benyttes, når liganderne er halogenider eller oxider. Ifølge konventionen betragtes et enkelt koordineret hydrogenatom altid som anion og optræder i kompleksnavnet som 'hydrido'. Derimod behandles koordineret dihydrogen normalt som en neutral to-elektron-donorspecies.

### 2.3 Dannelse af additive navne

Når liganderne har fået deres navne, kan navnet bygges op. Det gøres ved at anføre ligandnavnene, i alfabetisk rækkefølge, før centralatomets (-atomernes) navn, *uden* hensyn til ligandernes ladning.

Er mere end én ligand af en bestemt slags på samme måde bundet til centralatomet, vises antallet af disse ligander ved hjælp af det relevante multiplikative præfiks for simple eller sammensatte ligander (Tabel 2), uden at den allerede etablerede alfabetiske rækkefølge af liganderne ændres. Der, hvor der skal bruges mere end ét par parenteser i et navn, er rækkefølgen: (), [], {[()}], {[{}]}, osv.

Tilstedeværelse af **metal-metalbindinger** vises ved at sætte centralatomernes symboler i parenteser, kursivere dem, forbinde dem med en lang tankestreg og bringe dem efter kompleksnavnet (uden mellemrum). Kompleksets **ladningstal** eller centralatomets **oxidationstal** føjes til kompleksnavnet. Ved **anioner**, som benævnes additivt, forsynes centralatomets navn med endelsen 'at', svarende til endelsen 'id' for homoatomige anioner (Afsnit 1). I en række tilfælde benyttes det latinske navns ordstamme igen ved dannelsen af 'at'-navnet, fx ferrat (for jern), cuprat (for kobber), argentat (for sølv), stannat (for tin), aurat (for guld) og plumbat (for bly).<sup>12</sup> Endelig gælder den støkiometriske nomenklatur regler (Afsnit 1), når de additive navne på ioniske eller neutrale koordinationskomponenter skal sammensættes med navnene på eventuelle andre species, som indgår i forbindelsen.

### 2.4 Specifikation af konnektivitet

Nogle ligander kan bindes til et centralatom gennem forskellige atomer (**ligatorer** eller **koordinerende** atomer), afhængigt af omstændighederne. Specifikationen af ligatorerne i et givet kompleks kan ske ved tilføjelse af **κ-termer** (kappa-termer) til ligandnavnet. En κ-term består af det græske bogstav κ, efterfulgt af ligatoratomets grundstofsymbol i kursiv. Ved komplicerede ligander anbringes κ-terminen ofte inden for ligandnavnet, efter den gruppe, som κ-terminen hører til. Flere ens bindinger til et centralatom kan vises ved at tilføje det relevante tal i hævet skrift mellem κ og grundstofsymbolerne (se Tabel 6). Mulighederne diskuteres nærmere i den Røde Bog.<sup>13</sup> Hvis en ligands ligatoratomer er bundet til hinanden, benyttes i stedet en **η-term** (eta-term, græsk η), fx ved mange metalorganiske forbindelser (Afsnit 2.6) og peroxidokomplekset i Tabel 6.

En κ-term er nødvendig for ligander, som kan koordinere på mere end én måde. Typiske eksempler er thiocyanat, som enten kan koordinere gennem svovlatomet (thiocyanato-κS) eller gennem nitrogenatomet (thiocyanato-κN), og nitrit, som enten kan koordinere gennem nitrogenatomet (M–NO<sub>2</sub>, nitrito-κN) eller gennem et oxygenatom (M–ONO, nitrito-κO). Navnene pentaammin(nitrito-κN)cobalt(2+) og pentaammin(nitrito-κO)cobalt(2+) benyttes for de to isomere nitritokompleksskationer. Flere eksempler på navnekonstruktioner, hvor konnektiviteten beskrives med κ-termer, ses i Tabel 6. En κ-term kan også benyttes til at vise, hvilket centralatom en ligand er koordineret til, når der er mere end ét centralatom (Afsnit 2.5).

**Tabel 6: Dannelse af kompleksnavne: sammensatte ligander**

|                                 |                                                                                                            |                                                                                                                                     |
|---------------------------------|------------------------------------------------------------------------------------------------------------|-------------------------------------------------------------------------------------------------------------------------------------|
| Struktur, der skal navngives    | 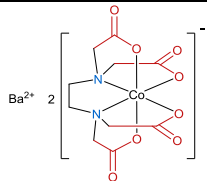                       |                                                 |
| Centralatom                     | <b>cobalt(III)</b> → <b>cobaltat(III)</b>                                                                  | <b>platin(II)</b>                                                                                                                   |
| Identificér og navngiv ligander | 2,2',2'',2'''-(ethan-1,2-diyldinitrilo)tetraacetato → 2,2',2'',2'''-(ethan-1,2-diyldinitrilo)tetraacetato  | chlorid → <b>chlorido</b><br>triphenylphosphan                                                                                      |
| Specificér ligatorer            | 2,2',2'',2'''-(ethan-1,2-diyldinitrilo-κ <sup>2</sup> N)tetraacetato-κ <sup>4</sup> O                      | <i>ikke påkrævet ved chlorid</i><br>triphenylphosphan-κP                                                                            |
| Samlet navn                     | barium[2,2',2'',2'''-(ethan-1,2-diyldinitrilo-κ <sup>2</sup> N)tetraacetato-κ <sup>4</sup> O]cobaltat(III) | <b>dichloridobis(triphenylphosphan-κP)platin(II)</b>                                                                                |
| Struktur, der skal navngives    |                       |                                                |
| Centralatom                     | <b>cobalt(III)</b>                                                                                         | <b>molybden(III)</b>                                                                                                                |
| Identificér og navngiv ligander | ethan-1,2-diamin<br>peroxido → <b>peroxido</b>                                                             | chlorid → <b>chlorido</b><br>1,4,8,12-tetrathiacyclopentadecan                                                                      |
| Specificér ligatorer            | ethan-1,2-diamin-κ <sup>2</sup> N<br>η <sup>2</sup> -peroxido                                              | <i>ikke påkrævet ved chlorid</i><br>1,4,8,12-tetrathiacyclopentadecan-κ <sup>3</sup> S <sup>1</sup> ,S <sup>4</sup> ,S <sup>8</sup> |
| Samlet navn                     | <b>bis(ethan-1,2-diamin-κ<sup>2</sup>N)= (η<sup>2</sup>-peroxido)cobalt(III)</b>                           | <b>trichlorido(1,4,8,12-tetrathiacyclopentadecan-κ<sup>3</sup>S<sup>1</sup>,S<sup>4</sup>,S<sup>8</sup>)molybden(III)</b>           |

### 2.5 Broligander

Broligander er ligander, som er bundet til mere end ét centralatom. De fremhæves i navne ved tilføjelse af præfikset 'μ' (græsk my), således at præfikset og broligandens navn skilles fra hinanden, og fra resten af navnet, ved bindestreger. Dette er tilstrækkeligt for ligander, som kun består af ét atom, men hvis liganden er mere kompliceret, kan det blive nødvendigt at præcisere, hvilket af ligandens ligatoratomer, der er bundet til hvilket centralatom, og det håndteres med κ-termer.

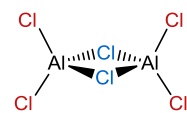

**di-μ-chlorido-bis[di-chloridoaluminium(III)]**  
[Cl<sub>2</sub>Al(μ-Cl)<sub>2</sub>AlCl<sub>2</sub>]

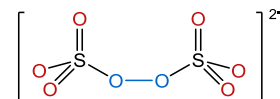

**μ-peroxido-1κO<sup>1</sup>,2κO<sup>2</sup>-bis(trioxidosulfat(2-))**  
[O<sub>3</sub>S(μ-O<sub>2</sub>)SO<sub>3</sub>]<sup>2-</sup>

## 2.6 Metalorganiske forbindelser

Metalorganiske forbindelser indeholder mindst én binding mellem et metalatom og et carbonatom. De navngives som koordinationsforbindelser ved hjælp af det additive nomenklatorsystem (se ovenfor).

Navnet på en organisk ligand, som  **binder med ét carbonatom**, kan konstrueres ved at man enten betragter liganden som anion eller som en neutral substituentgruppe. Således kaldes  $[\text{Ti}(\text{CH}_2\text{CH}_2\text{CH}_3)\text{Cl}_3]$  trichlorido(propan-1-ido)titan eller trichlorido(propyl)titan. Tilsvarende kaldes liganden  $-\text{CH}_3$  'methanido' eller 'methyl'.

Danner en organisk ligand **to eller tre metal-carbon-enkeltbindinger** (med et eller flere metalcentre), kan liganden behandles som di- eller trianion, hvilket fører til endelserne 'diido' respektive 'triido'. Også her møder man stadigvæk hyppigt navne, hvor sådanne ligander betragtes som substituerer med de tilhørende suffikser 'diyl' respektive 'triyl'. Således ville man kalde den bidentate ligand  $-\text{CH}_2\text{CH}_2\text{CH}_2-$  propan-1,3-diido (eller propan-1,3-diyl), når den danner et chelat med et metalcentrum, henholdsvis  $\mu$ -propan-1,3-diido (eller  $\mu$ -propan-1,3-diyl), når den danner en bro mellem to metalatomer.

For metalorganiske forbindelser, som indeholder **metal-carbon-flerdobbelbindinger**, anvendes ligandbetegnelser, som afledes af de tilsvarende stamhydridnavne med suffikset 'ylden' for en metal-carbon-dobbelbinding og 'ylidyn' for en metal-carbon-tripelbinding. Disse suffikser erstatter enten endelsen 'an' hos stamhydridet eller tilføjes stamhydridets navn efter en indskudt lokant. Således kaldes substituenten  $\text{CH}_3\text{CH}_2\text{CH}=\text{C}$  propyliden og  $(\text{CH}_3)_2\text{C}=\text{C}$  propan-2-yliden. Også 'diido/triido'-metoden kan bruges her. Betegnelserne 'carben' og 'carbyn' bruges ikke i systematisk nomenklatur.

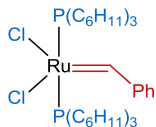

dichlorido(phenylmethylidene)bis(tricyclohexylphosphan- $\kappa P$ )ruthenium,  
dichlorido(phenylmethandiido)bis(tricyclohexylphosphan- $\kappa P$ )ruthenium  
eller (benzyliden)dichloridobis(tricyclohexylphosphan- $\kappa P$ )ruthenium

Den specielle 'sidelæns' binding af umættede carbonhydrider til metaller *via* deres  $\pi$ -elektroner kræver brug af  **$\eta$ -konventionen** (eta-konventionen). I denne 'hapto'-nomenklatur angives antallet af sammenhængende atomer i liganden, som er koordineret til metallet (ligandens hapticitet) med hævet skrift på højre side af symbolet  $\eta$ , fx  $\eta^3$  (læses som 'eta tre' eller 'trihapto'). En  $\eta$ -term føjes som præfix til ligandnavnet eller til den del af ligandnavnet, som er mest egnet til at vise konnektiviteten, om nødvendigt med lokanter.

En liste med mange  $\pi$ -bindende umættede ligander, såvel neutrale som anioniske, findes i den Røde Bog.<sup>14</sup>

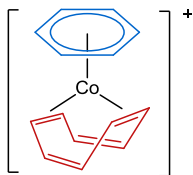

$(\eta^6\text{-benzen})[(1,2,5,6\text{-}\eta)\text{-cycloocta-1,3,5,7-tetraen}]$ cobalt(1+)

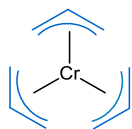

tris( $\eta^3\text{-prop-2-en-1-ido}$ )chrom,  
tris( $\eta^3\text{-prop-2-en-1-yl}$ )chrom eller  
tris( $\eta^3\text{-allyl}$ )chrom

Det skal bemærkes, at den allestedsnærværende ligand  $\eta^5\text{-C}_5\text{H}_5$ , mere præcist  $\eta^5\text{-cyclopenta-2,4-dien-1-ido}$ , også godt må kaldes  $\eta^5\text{-cyclopentadienido}$  eller  $\eta^5\text{-cyclopentadienyl}$ . Når cyclopenta-2,4-dien-1-ido koordinerer med ét carbonatom ved en  $\sigma$ -binding, tilføjes en  $\kappa$ -term for at vise denne binding eksplicit. Symbolet  $\eta^1$  må ikke bruges;  $\eta$ -konventionen refererer kun til situationer, hvor flere sammenhængende atomer i en ligand er fælles om bindingen.

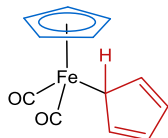

dicarbonyl( $\eta^5\text{-cyclopentadienido}$ )(cyclopenta-2,4-dien-1-ido- $\kappa C^1$ )jern  
eller dicarbonyl( $\eta^5\text{-cyclopentadienyl}$ )(cyclopenta-2,4-dien-1-yl- $\kappa C^1$ )jern

Enkeltmolekyler, som indeholder to *parallelle*  $\eta^5\text{-cyclopentadienidoligander}$  i en 'sandwich'-struktur med et metalatom i midten, som fx i bis( $\eta^5\text{-cyclopentadienido}$ )jern, har fået det generiske navn metallocener, og må gives 'ocen'-navne, i dette tilfælde ferrocen. Disse 'ocen'-navne må bruges på samme måde som stamhydridnavne bruges i substitutiv nomenklatur, mens substituentnavnene får endelserne 'ocenylyl', 'ocendiyl', 'ocentriyl' osv. (og forsynes med de relevante lokanter).

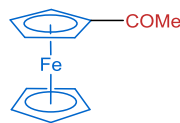

1-ferrocenylethan-1-on

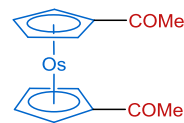

1,1'-(osmocen-1,1'-diyl)di-(ethan-1-on)

Der gælder den konvention, at 'organoelement'-forbindelser af hovedgruppegrundstofferne benævnes ved hjælp af substitutiv nomenklatur, hvis det drejer sig om grundstoffer fra grupperne 13–16, derimod ved hjælp af additiv nomenklatur, når de er dannet af grundstofferne i grupperne 1 og 2. Af og til benytter man støkiometrisk nomenklatur, når der kun er brug for en angivelse af strukturens hovedtræk. Mere om dette emne findes i den Røde Bog.<sup>15</sup>

## 2.7 Formler for koordinationsforbindelser

Formler for koordinationsforbindelser placeres inden for kantede parenteser for at vise den givne species' sammensætning. Fremgangsmåden i sin helhed vises i Tabel 7. Symbolet for centralatomet skal stå først og følges af symbolerne eller forkortelserne for liganderne (i alfa-

Tabel 7: Opbygning af formler for komplekser

|                     |                                                                       |                                                        |
|---------------------|-----------------------------------------------------------------------|--------------------------------------------------------|
| Struktur            |                                                                       |                                                        |
| Centralatom(er)     | Co                                                                    | 2 × Re                                                 |
| Ligander            | NH <sub>3</sub> , OH <sub>2</sub>                                     | Cl                                                     |
| Saml formel         | [Co(NH <sub>3</sub> ) <sub>5</sub> (OH <sub>2</sub> )]Cl <sub>3</sub> | Cs <sub>2</sub> [Cl <sub>4</sub> ReReCl <sub>4</sub> ] |
| Struktur            |                                                                       |                                                        |
| Centralatom(er)     | Co                                                                    | Pt                                                     |
| Ligand-forkortelser | 2,2',2'',2'''-(ethan-1,2-diyl)dinitrilotetraacetat → edta             | Cl<br>triphenylphosphan → PPh <sub>3</sub>             |
| Saml formel         | Ba[Co(edta)] <sub>2</sub>                                             | [PtCl <sub>2</sub> (PPh <sub>3</sub> ) <sub>2</sub> ]  |

betisk rækkefølge, alt efter hvordan de er skrevet i formelen). Hvis det er muligt, skal det koordinerende atom (ligatoratomet) placeres nærmest centralatomet for at give mere information om kompleksets struktur. Hvis det kan lade sig gøre, skal broligander af samme grund placeres mellem symbolerne for centralatomerne (se eksemplerne i Afsnit 2.5). I almindelighed skal ligandformler og -forkortelser have parenteser omkring, undtagen hvis liganden er énatomig. Multiple ligander angives ved et subscript til højre for ligandsymbolet.

## 2.8 Uorganiske oxosyrer og beslægtede forbindelser

De uorganiske oxosyrer og de anioner, som fås ved at fjerne de sure **hydroner** ( $\text{H}^+$ ) fra dem, har traditionelle navne, af hvilke mange er velkendte og brugt i mange lærebøger: svovlsyre, sulfat; salpetersyre, nitrat; salpetersyring, nitrit; phosphorsyre, fosfat; arsensyre, arsenat; arsensyring, arsenit; kiselure, silicat; osv. Disse navne bibeholdes i IUPAC-nomenklaturen, for det første fordi de stort set altid bruges i praksis, for det andet fordi de spiller en speciel rolle i den organiske nomenklatur, hvor de indgår i navnene på organiske derivater. Ikke desto mindre kan selve oxosyrerne og deres derivater betragtes som koordinationsforbindelser og gives systematiske navne ved hjælp af den additive nomenklatur (Tabel 8).

De traditionelle oxosyrenavne kan modificeres ifølge velkendte regler for navngivning af derivater, som dannes ved **funktionel udskiftning**<sup>16</sup>: således betyder 'thio' erstatning af =O med =S; præfikserne 'fluor',

**Tabel 8: Eksempler på uorganiske oxosyrer og deres derivater**

| Formel                                                                                        | Traditionelt eller organisk navn | Additivt navn                                        |
|-----------------------------------------------------------------------------------------------|----------------------------------|------------------------------------------------------|
| H <sub>2</sub> SO <sub>4</sub> eller [S(O) <sub>2</sub> (OH) <sub>2</sub> ]                   | svovlsyre                        | dihydroxidodioxidosvovl                              |
| (CH <sub>3</sub> ) <sub>2</sub> SO <sub>4</sub> eller [S(O) <sub>2</sub> (OMe) <sub>2</sub> ] | dimethylsulfat                   | dimethoxidodioxidosvovl or dimethanolatodioxidosvovl |
| H <sub>2</sub> P(O) <sub>3</sub> eller [P(H)(O)(OH) <sub>2</sub> ]                            | phosphorsyre*                    | hydridodihydroxidooxido=phosphor                     |
| PhP(O)(OH) <sub>2</sub>                                                                       | phenylphosphorsyre               | dihydroxidooxido(phenyl)=phosphor                    |

\*Note: Navnet 'phosphorsyrling' (engelsk 'phosphorous acid') har været brugt i litteraturen både om den i Tabel 8 viste species og om isomeren P(OH)<sub>3</sub>, trihydroxidophosphor. Navnet bruges i organisk-kemisk nomenklatur i sidstnævnte betydning.

'chlor' osv. og infikserne 'fluorid', 'chlorid' osv. betyder erstatning af -OH med -F, -Cl osv., mens 'peroxy'/'peroxo' betyder erstatning af -O- med -OO-; osv. (Tabel 9).

Er alle hydroxylgrupper i en oxosyre blevet erstattet, er forbindelsen ikke længere en syre og bliver så heller ikke benævnt som en sådan. Forbindelsen får til gengæld et **radikofunktionelt navn (funktionsklassenavn)**<sup>16</sup> som fx et syrehalogenid eller et -amid. Sådanne forbindelser kan desuden gives systematiske navne ved brug af den additive nomenklatur (Tabel 10).

**Tabel 9: Eksempler på derivater af uorganiske oxosyrer og anioner dannet ved funktionel udskiftning**

| Formel                                                                                  | Funktionelt udskiftningsnavn                      | Additivt navn                     |
|-----------------------------------------------------------------------------------------|---------------------------------------------------|-----------------------------------|
| H <sub>3</sub> PS <sub>4</sub> eller [P(S)(SH) <sub>3</sub> ]                           | tetrathiophosphorsyre eller phosphortetrathiosyre | tris(sulfanido)sulfido=phosphor   |
| H <sub>2</sub> PFO <sub>3</sub> eller [PF(O)(OH) <sub>2</sub> ]                         | fluorophosphorsyre eller phosphorfluoridsyre      | fluoridodihydroxido=oxidophosphor |
| S <sub>2</sub> O <sub>3</sub> <sup>2-</sup> eller [S(O) <sub>3</sub> (S)] <sup>2-</sup> | thiosulfat eller svovlthioat                      | trioxidosulfido=sulfat(2-)        |
| [O <sub>3</sub> S(μ-O <sub>2</sub> )SO <sub>3</sub> ] <sup>2-</sup>                     | peroxydisulfat                                    | se Afsnit 2.5                     |

**Tabel 10: Eksempler på radikofunktionelle navne og tilsvarende additive navne**

| Formel                                          | Radikofunktionelt navn | Additivt navn            |
|-------------------------------------------------|------------------------|--------------------------|
| PCl <sub>3</sub> O                              | phosphoryltrichlorid   | trichloridooxidophosphor |
| SCl <sub>2</sub> O <sub>2</sub>                 | sulfuryldichlorid      | dichloridodioxidosvovl   |
| S(NH <sub>2</sub> ) <sub>2</sub> O <sub>2</sub> | svovlsyrediamid        | diamidodioxidosvovl      |

En speciel konstruktion er **hydrogennavne**, hvor man gør rede for hydroner, som er bundet til en anion, uden at det siges præcist hvor. I denne type navne placeres ordet 'hydrogen' (med et multiplikativt præfiks, hvis nødvendigt) først i navnet, og resten af navnet sættes i parentes. Eksempelvis svarer navnet dihydrogen(diphosphat)(2-) til H<sub>2</sub>P<sub>2</sub>O<sub>7</sub><sup>2-</sup>, en diphosphatanion med to tilføjede hydroner, hvis positioner er ukendte eller i hvert fald ikke oplyst.

Man kan betragte de gængse navne for delvist dehydrerede oxosyrer som fx hydrogenphosphat, HPO<sub>4</sub><sup>2-</sup>, og dihydrogenphosphat, H<sub>2</sub>PO<sub>4</sub><sup>-</sup>, som specielle tilfælde af sådanne hydrogennavne. I disse forenklede navne er ladningstallet og parenteserne omkring navnets hoveddel udeladt. Som set før kan disse specielle anioner få systematiske navne ved brug af additiv nomenklatur.

### 3 STEREODESKRIPTORER

Den omtrentlige geometri omkring centralatomet beskrives ved hjælp af et **polyedersymbol**, som står først i navnet. Symbolet er bygget op af bogstavkoder (i kursiv) for geometrien og et tal, som svarer til koordinations-tallet. Hyppigt brugte polyedersymboler er *OC-6* (oktaedrisk), *SP-4* (plankvadratisk), *T-4* (tetraedrisk), *SPY-5* (kvadratisk pyramidisk) og *TBPY-5* (trigonalt pyramidisk). Mere omfattende lister findes i Ref. 17.

Ligatorers relative positioner omkring et centralatom kan beskrives ved hjælp af et **konfigurationsindeks**, som bestemmes ved en nærmere bestemt procedure for hver enkelt geometri,<sup>18</sup> baseret på de koordinerende grupper Cahn-Ingold-Prelog-prioriteter,<sup>19</sup> og det kan ændre sig, når ligander udskiftes, selv om geometrien forbliver uændret. Også den absolutte konfiguration lader sig beskrive. Normalt benyttes konfigurationsindices kun, når der eksisterer mere end én mulighed, og hvor en bestemt stereoisomer skal specificeres. De fuldstændige stereodeskriptorer for de nedenfor viste plankvadratiske platin-komplekser er (*SP-4-2*) for *cis*-isomeren og (*SP-4-1*) for *trans*-isomeren.

Som alternativ kan man i specielle situationer benytte en række traditionelle stereodeskriptorer. Således betegnes de mulige isomerer, når et plankvadratisk center er koordineret til to ligatorer af én og to af en anden art, som *cis*- (når to identiske ligander er i nabostillinger) eller *trans*- (når de to identiske ligander er placeret modsat hinanden).

Også oktaedriske centre med fire ligander af én art og to ligander af en anden art benævnes som *cis*- (når de to identiske ligander optager nabostillinger) og *trans*- (når disse ligander er placeret modsat hinanden). Oktaedriske centre med tre ens ligander af én art og tre af en anden kaldes *fac*- (facial), når de tre ens ligander er placeret på hjørnerne af en oktaederside, og *mer*- (meridional), når de ikke er det.

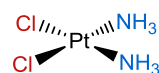*cis*-diamminedichloridoplatin(II)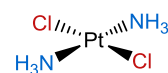*trans*-diamminedichloridoplatin(II)

### 4 SAMMENFATNING

Dette dokument giver et overblik over de væsentlige nomenklaturregler for dannelse af navne og formler for uorganiske forbindelser, koordinationsforbindelser og metalorganiske forbindelser. Paralleldokumentet vedrørende nomenklatursystemer i [organisk kemi](#)<sup>2</sup> vil også være nyttigt for læseren.

Navne og formler har kun spillet halvdelen af deres rolle, når de skabes og anvendes til at beskrive eller genkende forbindelser, fx i publikationer. For at de kan spille deres rolle fuldt ud, skal læseren af et navn eller en formel være i stand til at tolke det korrekt, fx ved at tegne strukturen. Nærværende dokument har også det formål at støtte tolkningen af navne og formler.

Endelig skal vi bemærke, at IUPAC har udsendt anbefalinger for den grafiske repræsentation af kemiske strukturer og deres rumlige konfigurationer.<sup>20</sup>

Ved henvisning til denne vejledning citerer venligst: IUPAC, [Pure Appl. Chem.](#) **87**, 1039–1049 (2015).

Enhver offentliggørelse af nærværende dokument i fuldstændig og uforandret form er tilladt. Copyright for den engelske originaltekst tilhører IUPAC & De Gruyter 2015.

<sup>1</sup> Frit tilgængelige på: (a) <http://www.iupac.org/publications/pac/>;

(b) <http://www.chem.qmul.ac.uk/iupac/>.

<sup>2</sup> K.-H. Hellwich, R. M. Hartshorn, A. Yerin, T. Damhus, A. T. Hutton, Brief Guide to the Nomenclature of Organic Chemistry, *Pure Appl. Chem.*, under udarbejdelse.

<sup>3</sup> R. C. Hiorns, R. J. Boucher, R. Duhlev, K.-H. Hellwich, P. Hodge, A. D. Jenkins, R. G. Jones, J. Kahovec, G. Moad, C. K. Ober, D. W. Smith, R. F. T. Stepto, J.-P. Vairon, J. Vohlidal, *Pure Appl. Chem.* **84**(10), 2167–2169 (2012).

<sup>4</sup> *Principles of Chemical Nomenclature – A Guide to IUPAC Recommendations, 2011 Edition*, G. J. Leigh (Ed.), Royal Society of Chemistry, Cambridge, U.K., ISBN 978-1-84973-007-5.

<sup>5</sup> *Nomenclature of Inorganic Chemistry – IUPAC Recommendations 2005*, N. G. Connelly, T. Damhus, R. M. Hartshorn, A. T. Hutton (Eds.), Royal Society of Chemistry, Cambridge, U.K., ISBN 0-85404-438-8.

<sup>6</sup> *Nomenclature of Organic Chemistry – IUPAC Recommendations and Preferred Names 2013*, H. A. Favre, W. H. Powell (Eds.), Royal Society of Chemistry, Cambridge, U.K., ISBN 978-0-85404-182-4.

<sup>7</sup> *Compendium of Polymer Terminology and Nomenclature – IUPAC Recommendations 2008*, R. G. Jones, J. Kahovec, R. Stepto, E. S. Wilks, M. Hess, T. Kitayama, W. V. Metanowski (Eds.), Royal Society of Chemistry, Cambridge, U.K.,

ISBN 978-0-85404-491-7.

<sup>8</sup> Reference 4, Chapter 10.

<sup>9</sup> Reference 5, Table IX.

<sup>10</sup> Reference 4, Table P10.

<sup>11</sup> Reference 5, Chapter IR-6.

<sup>12</sup> Reference 5, Table X.

<sup>13</sup> Reference 5, Section IR-9.2.4.

<sup>14</sup> Reference 5, Table IR-10.4.

<sup>15</sup> Reference 5, Section IR-10.3.

<sup>16</sup> Reference 5, Chapter IR-8.

<sup>17</sup> Reference 4, Table P5; Reference 5, Table IR-9.2 og Table IR-9.3.

<sup>18</sup> Reference 5, Section IR-9.3.3.

<sup>19</sup> R. S. Cahn, C. Ingold, V. Prelog, *Angew. Chem., Int. Ed. Engl.*, **5**, 385–415 og 511 (1966); V. Prelog, G. Helmchen, *Angew. Chem., Int. Ed. Engl.*, **21**, 567–583 (1982).

<sup>20</sup> J. Brecher, K. N. Degtyarenko, H. Gottlieb, R. M. Hartshorn, G. P. Moss, P. Murray-Rust, J. Nyitrai, W. Powell, A. Smith, S. Stein, K. Taylor, W. Town, A. Williams, A. Yerin, *Pure Appl. Chem.*, **78**(10), 1897–1970 (2006); J. Brecher, K. N. Degtyarenko, H. Gottlieb, R. M. Hartshorn, K.-H. Hellwich, J. Kahovec, G. P. Moss, A. McNaught, J. Nyitrai, W. Powell, A. Smith, K. Taylor, W. Town, A. Williams, A. Yerin, *Pure Appl. Chem.*, **80**(2), 277–410 (2008).
